# Supplementary material
Source: Royal Society of Chemistry journal article supplement (doi:10.1039/d6ta02681h)
Supplement: d6ta02681h1.pdf [file d6ta02681h1.pdf]

Supporting Information for

**Hierarchically Structured MIL-100(Al) Beads for Diffusion-  
Optimized Amine Sorbents in Direct Air Capture**

Phat Ngoc Nguyen<sup>a</sup>, Thach N. Tu<sup>\*,a</sup>, Hae-Kwon Jeong<sup>\*,a,b</sup>, and Jinsoo Kim<sup>\*,a</sup>

<sup>a</sup>Department of Chemical Engineering (Integrated Engineering), Kyung Hee University,  
1732 Deogyong-daero, Giheung-gu, Yongin-si, Gyeonggi-do 17104, Republic of Korea.

<sup>b</sup>Artie McFerrin Department of Chemical Engineering, Texas A&M University, 3122  
TAMU, College Station, TX 77843-3122, USA

Email: tungoethach1987@gmail.com, hjeong7@tamu.edu, [jkim21@khu.ac.kr](mailto:jkim21@khu.ac.kr)

## **Section S1: Materials, Analytical Techniques and Experimental Methods**

### **Materials**

Aluminum-tri-sec-butoxide (ALTSB, 97%), and poly(vinyl alcohol) (PVA, Mw 31,000-50,000, 98-99% hydrolyzed), Trimesic acid (95%), Ethylenediamine (EDA, 99%), Triethylamine (TEA, 99%), Diethylenetriamine (DETA, ReagentPlus®, 99%), Pentaethylenehexamine (PEHA, technical grade), N, N'-dimethylethylenediamine (MMEN, 98%), Toluene (anhydrous), Methanol (MeOH, 99.9%) were purchased from Sigma-Aldrich. Nitric acid (HNO<sub>3</sub>, 60%) was obtained from Daejung Chemical, Korea, and carbon nanotubes were purchased from Carbon Nano-material Technology Co.,Ltd, Korea. The purified water (18.2 MΩ·cm) was produced by an Aquapuri 541 (Youngin Chromass, Korea). All the chemicals were used without further purification.

**Preparation of macroporous  $\gamma$ -alumina (Mac- $\gamma$ -Al) beads:** Boehmite sol (1M) was prepared by adding 0.1 mol ALTSB in the flask containing 100 mL of hot water (70-90°C) followed by stirring 1-2 hours continuously. Then, 7 mL 1M HNO<sub>3</sub> was slowly poured into the as-stirred Boehmite liquid, and the mixture was refluxed at 90-100°C for 10 hours. Carbon nanotubes (CNTs, multi-wall, 20 nm, 100 mg) were dispersed in a boehmite sol (1M, 4 mL) and homogenized by sonication and stirring, followed by the addition of a PVA solution (50g L<sup>-1</sup>, 4 mL). The resulting suspension was stirred for 30 min and dropped into liquid N<sub>2</sub> to form frozen beads, which were subsequently solvent-exchanged in cold EtOH (-10 °C) to facilitate gradual water removal. After warming to room temperature, the beads were collected, vacuum-dried (1 h), and further dried at 70 °C overnight. Calcination at 650 °C in air for 12 h removed the CNT and PVA templates, yielding macroporous  $\gamma$ -Al<sub>2</sub>O<sub>3</sub> beads.<sup>1</sup>

### **Analytical Techniques**

Powder X-ray diffraction (PXRD) patterns were collected using a RIGAKU MiniFlex600 diffractometer. The morphology of the beads and the powder was determined by scanning

electron microscopy (SEM; Leo-Supra 55, Carl Zeiss STM). The CO<sub>2</sub>, and N<sub>2</sub> isotherms at room temperature were collected using the BELSORP-mini with an equilibrium criterion of an adsorption amount change within 0.1 cm<sup>3</sup> g<sup>-1</sup> over 300 s at each pressure step. Thermal gravimetric analysis (TGA) was performed under a gas mixture of O<sub>2</sub> (20%) and N<sub>2</sub> (80%) at a temperature ramp rate of 5 °C min<sup>-1</sup>. Fourier transform infrared (FT-IR) spectra were measured on a PerkinElmer FT-IR spectrometer (Frontier model) using the ATR protocol. N<sub>2</sub> adsorption-desorption isotherms were measured at 77 K using a BELSORP-max instrument. Prior to the measurements, all as-synthesized samples were degassed at 150 °C under vacuum overnight to remove guest molecules and adsorbed moisture. The BET surface areas were calculated from the adsorption branch using the Brunauer-Emmett-Teller equation below. The fitting ranges were selected from the linear region of the BET plots and checked according to the BET consistency criteria.

BET equation:

$$\frac{1}{q\left(\frac{P}{P_0} - 1\right)} = \frac{C - 1}{q_m C} \left(\frac{P}{P_0}\right) + \frac{1}{q_m C} \quad (\text{eq. 1})$$

where  $q$  is the adsorbed amount at relative pressure  $P/P_0$ ,  $q_m$  is the monolayer capacity, and  $C$  is the BET constant. The BET surface area was calculated from:

$$S_{BET} = \frac{q_m N_A \sigma_{N_2}}{V_m} \quad (\text{eq. 2})$$

where  $\sigma_{N_2}$  is the molecular cross-sectional area of N<sub>2</sub>, 0.162 nm<sup>2</sup>, and  $V_m$  is the molar volume used for the adsorption units.

## Calculation of amine loading within Mac\_MIL-100Al beads

Amine mass fraction (wt%) from EA measurement:

$$w_{amine} (\%) = \frac{\Delta N}{f_{N, amine}} \quad (\text{eq. 3})$$

where

$$\Delta N = N_{func} - N_{pristine} \quad (\text{eq. 4})$$

is the increase in nitrogen content (wt% from EA), and

$$f_{N, amine} = \frac{n_N M_N}{M_{amine}} \quad (\text{eq. 5})$$

is the mass fraction of nitrogen in the amine ( $n_N$  = number of N atoms per amine molecules,  $M_N = 14.01 \text{ g mol}^{-1}$ ,  $M_{amine}$  = molar mass of the amine).

Molar amine loading ( $\text{mmol g}^{-1}$ ):

$$n_{amine} (\text{mmol g}^{-1}) = \frac{w_{amine}/100}{M_{amine}} \times 1000 \quad (\text{eq. 6})$$

Moles of Al and  $\text{Al}_3$  clusters per gram (from wt% Al)

$$n_{Al} (\text{mmol g}^{-1}) = \frac{w_{Al}/100}{M_{Al}} \times 1000 \quad (\text{eq. 7}) \quad \text{and} \quad n_{Al_3} (\text{mmol g}^{-1}) = \frac{n_{Al}}{3} \quad (\text{eq. 8})$$

where  $w_{Al}$  is the wt% Al in the samples (calculated from TGA) and  $M_{Al} = 26.98 \text{ g mol}^{-1}$

Amine molecules per  $\text{Al}_3$  cluster:

$$DETA \text{ per } Al_3 = \frac{n_{amine}}{n_{Al_3}} \quad (\text{eq. 9})$$

## Isosteric heat of $\text{CO}_2$ adsorption calculation

The isosteric heat of  $\text{CO}_2$  adsorption ( $Q_{st}$ ) was calculated from  $\text{CO}_2$  adsorption isotherms measured at 298 and 318 K using the virial fitting method. The adsorption branch was used for fitting. The virial equation was expressed as:

$$\ln P = \ln q + \frac{1}{T} \sum_{i=0}^m a_i q^i + \sum_{j=0}^n b_j q^j \quad (\text{eq. 10})$$

where  $P$  is the equilibrium pressure,  $q$  is the adsorbed amount,  $T$  is the absolute temperature, and  $a_i$  and  $b_j$  are virial fitting parameters. The isosteric heat of adsorption was calculated according to:

$$Q_{st} = -R \sum_{i=0}^m a_i q^i \quad (\text{eq. 11})$$

where  $R$  is the gas constant. The virial fitting curves for DETA@Mac\_MIL-100Al beads and the resulting  $Q_{st}$  profile are shown in Fig. S12.

### Calculation of IAST selectivity:

#### Binary gas composition and partial pressures:

$$y_{CO_2} = 4.0 \times 10^{-4}, \quad y_{N_2} = 1 - y_{CO_2} = 0.9996$$

Partial pressures:

$$P_i = y_i P_{tot} \quad (\text{eq. 12})$$

#### Pure-component isotherms and Henry's law:

$$q_i(P) \approx K_{H,i} P \quad (\text{eq. 13})$$

where  $K_{H,i}$  is the Henry constant.

$$K_H = \frac{\sum_k P_k q_k}{\sum_k P_k^2} \quad (\text{eq. 14})$$

#### Spreading pressure:

The spreading pressure of pure component  $i$  is defined as

$$\pi_i(P) = \int_0^P \frac{q_i(p)}{p} dp \quad (\text{eq. 15})$$

In IAST equilibrium, all components share a common spreading pressure  $\pi$ , and the corresponding equivalent pure-component pressure  $P_i^*$  satisfies

$$\pi = \pi_i(P_i^*) \quad (\text{eq. 16})$$

### IAST equilibrium condition and adsorbed-phase composition

The common spreading pressure  $\pi$  is obtained by solving

$$\sum_i \frac{P_i}{P_i^*(\pi)} = 1 \quad (\text{eq. 17})$$

where  $P_i^*(\pi)$  denotes the inverse mapping of Eq. 12. Once  $\pi$  is determined, the adsorbed-phase mole fractions  $x_i$  are given by

$$x_i = \frac{P_i}{P_i^*(\pi)}, \quad \sum_i x_i = 1 \quad (\text{eq. 18})$$

### CO<sub>2</sub>/N<sub>2</sub> selectivity

The IAST selectivity of CO<sub>2</sub> over N<sub>2</sub> is defined as:

$$S_{CO_2/N_2} = \frac{x_{CO_2}/x_{N_2}}{y_{CO_2}/y_{N_2}} \quad (\text{eq. 19})$$

**Section S2.** Characterization of Mac\_MIL-100Al beads, DETA@Mac\_MIL-100Al beads, MIL-100Al powder and DETA@MIL-100Al powder

**Table S1.** Elemental analysis

| Element | Mac_MIL-100Al beads | DETA@Mac_MIL-100Al beads | DETA@Mac_MIL-100Al beads (after 5 cycles) | MIL-100Al powder | DETA@MIL-100Al powder |
|---------|---------------------|--------------------------|-------------------------------------------|------------------|-----------------------|
| C       | 39.5                | 42.9                     | 42.8                                      | 38.95            | 41.20                 |
| H       | 2.62                | 5.01                     | 5.91                                      | 5.29             | 4.00                  |
| N       | 0.34                | 10.7                     | 10.4                                      | 0.79             | 8.04                  |

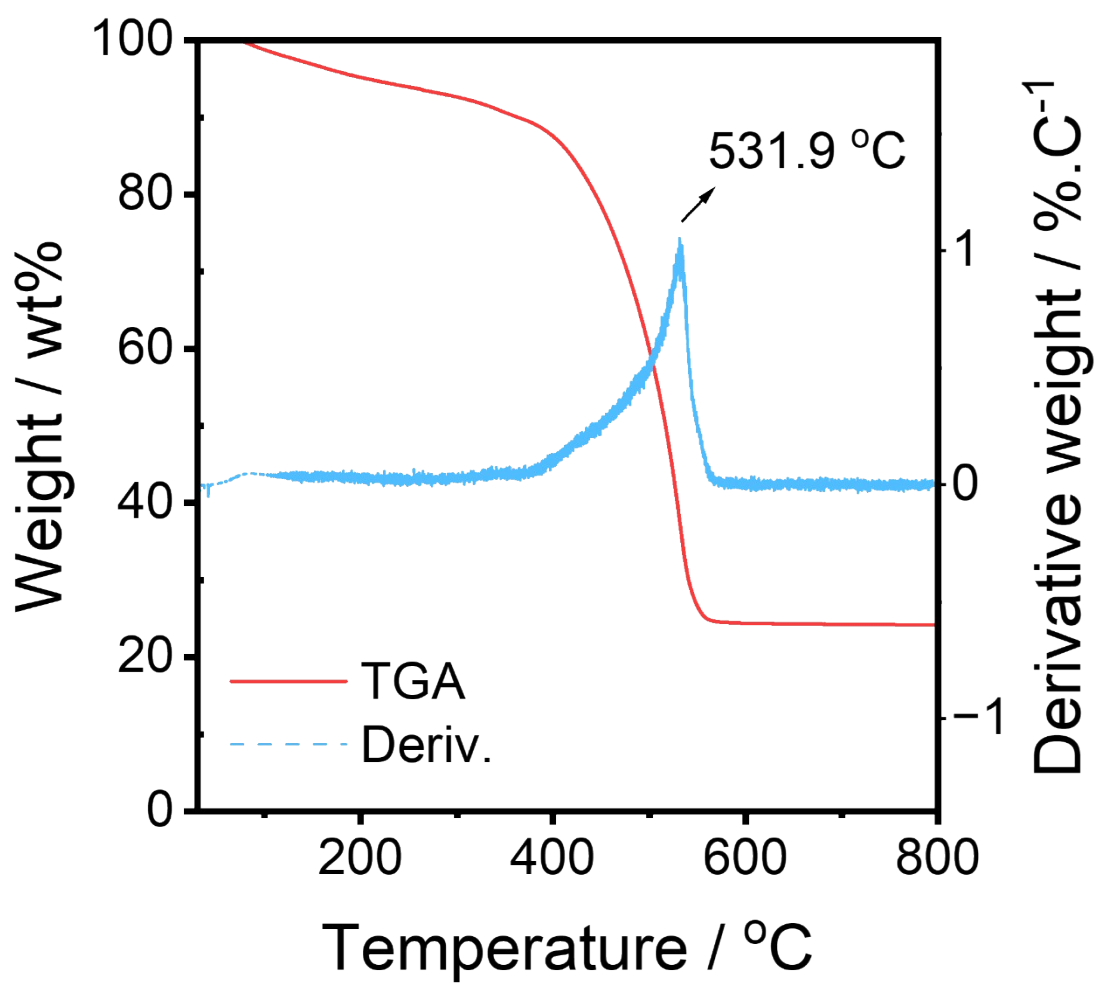

**Figure S1.** TGA profile of the Mac\_MIL-100Al beads synthesized for 3 h.

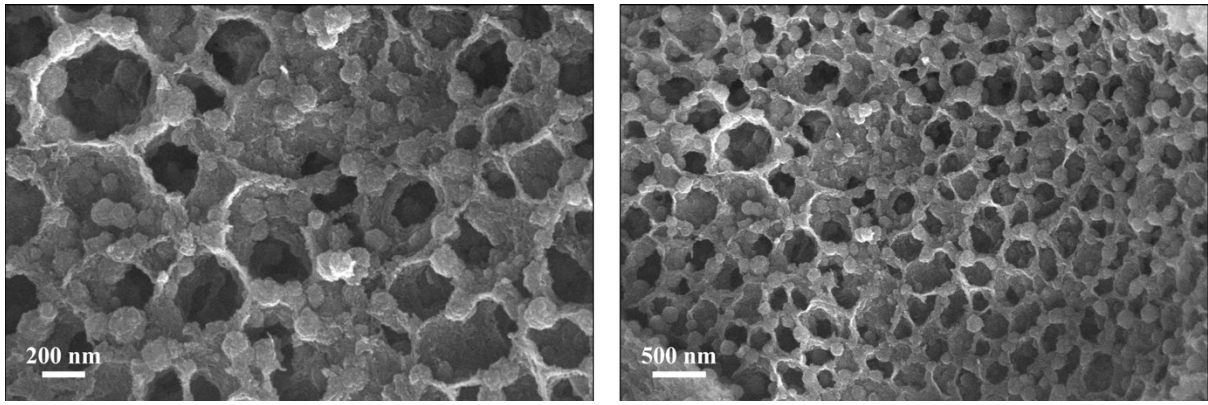

**Figure S2.** SEM images of 1-hour Mac\_MIL-100Al beads.

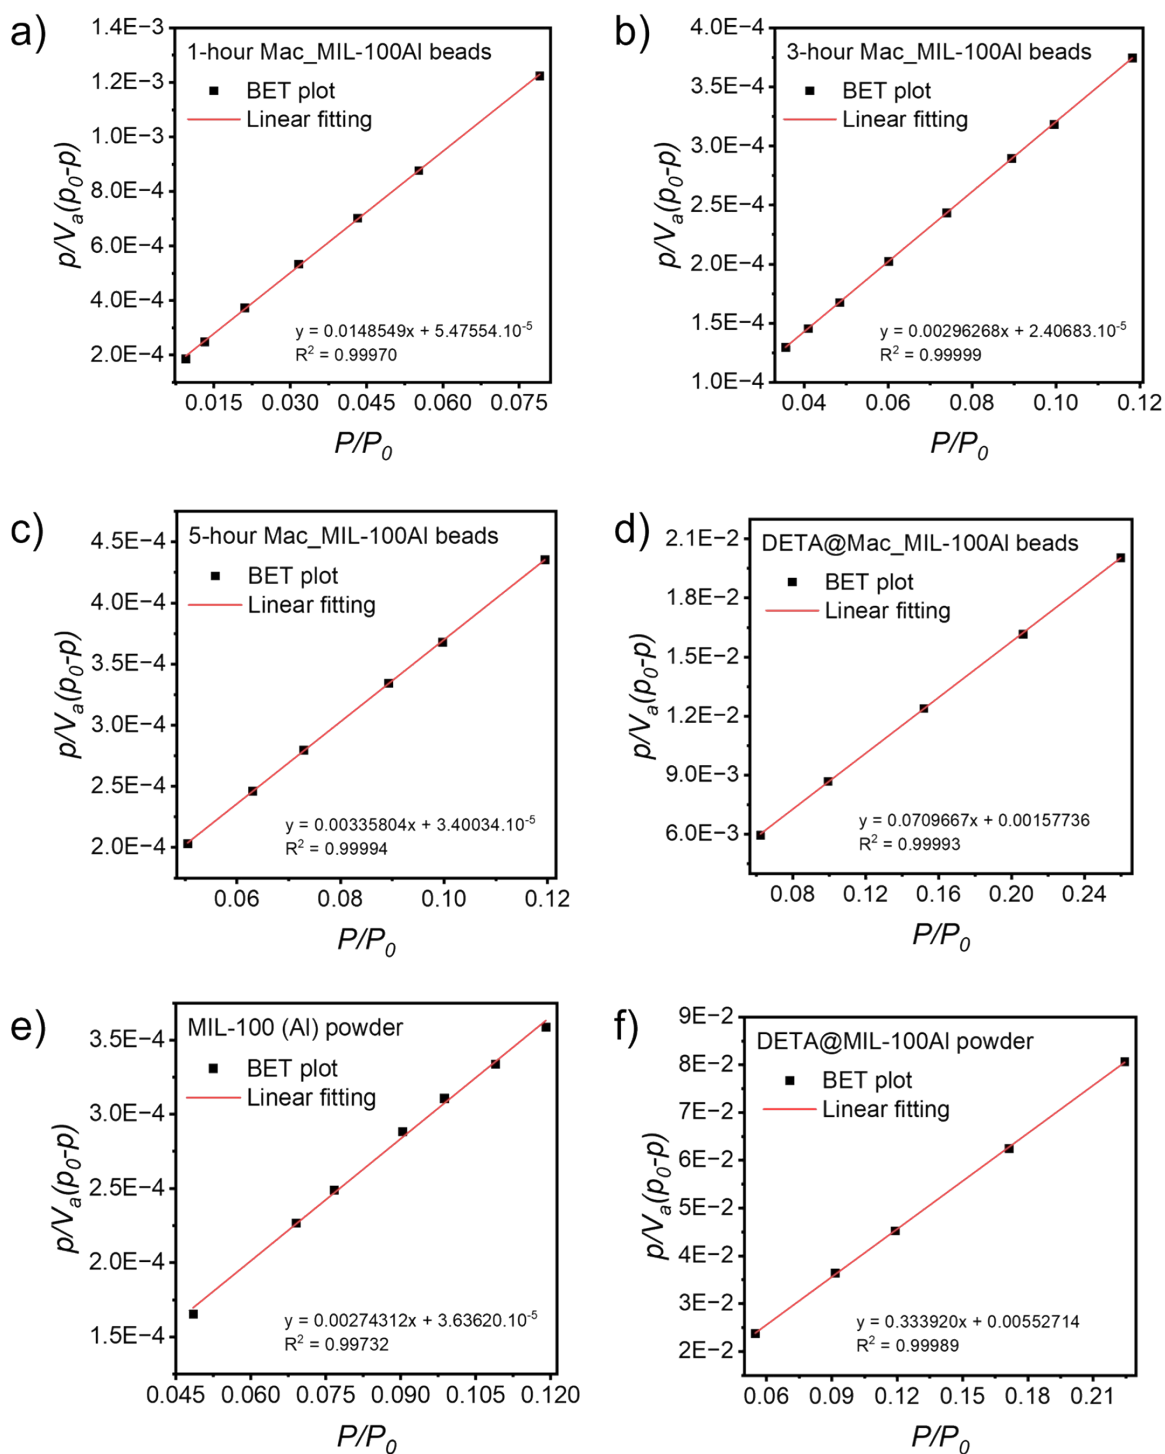

**Figure S3.** BET plots of (a) 1 h Mac\_MIL-100Al beads, (b) 3 h Mac\_MIL-100Al beads, (c) 5 h Mac\_MIL-100Al beads, (d) MIL-100Al powder, and (e) DETA@Mac\_MIL-100Al beads. The red lines indicate the linear fitting regions used for BET surface area calculation.

**Table S2.** Mechanical stability of Mac\_MIL-100 beads

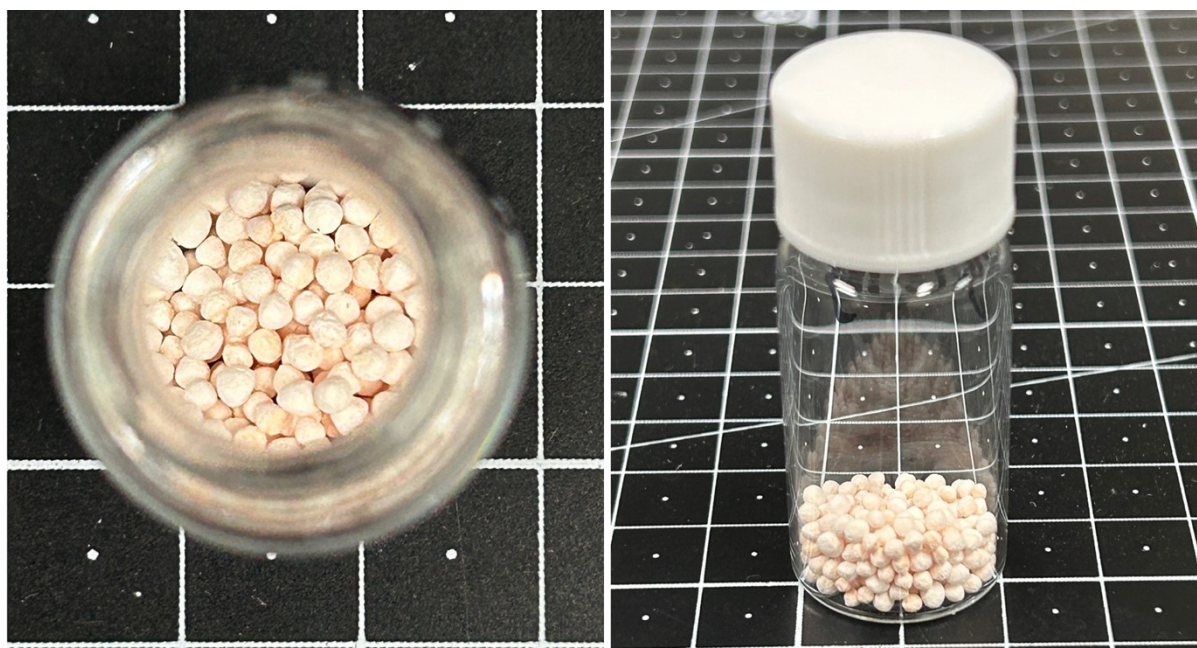

| Sample size / mm <sup>2</sup> | Stress at Break /MPa | Strain at Break / % | Young Modulus |
|-------------------------------|----------------------|---------------------|---------------|
| 7.5                           | 0.1                  | 34.28               | 3.28          |

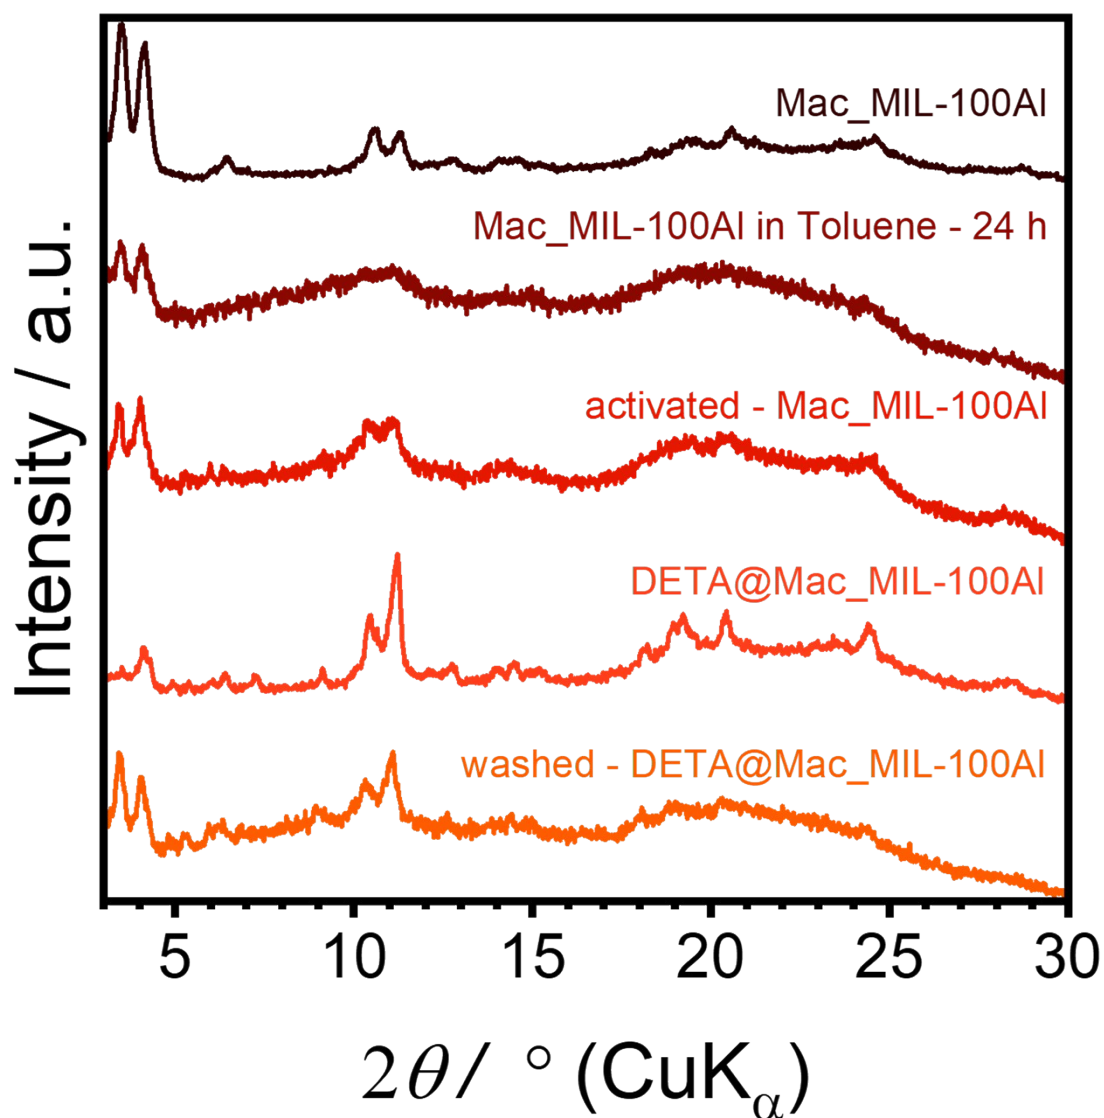

**Figure S4.** PXRD patterns of pristine Mac\_MIL-100Al, Mac\_MIL-100Al immersed in toluene for 24 h, toluene-treated Mac\_MIL-100Al then activating at 150 °C under vacuum overnight, DETA@Mac\_MIL-100Al, and MeOH-washed/activated DETA@Mac\_MIL-100Al. The attenuation of low-angle reflections after solvent treatment and DETA incorporation indicates the sensitivity of MIL-100(Al) diffraction contrast to guest/solvent occupation and local structural disorder. The partial recovery of low-angle reflections after MeOH washing and activation suggests that the MIL-100(Al) framework is not completely collapsed and that part of the attenuation arises from removable or weakly adsorbed guest/amine species.

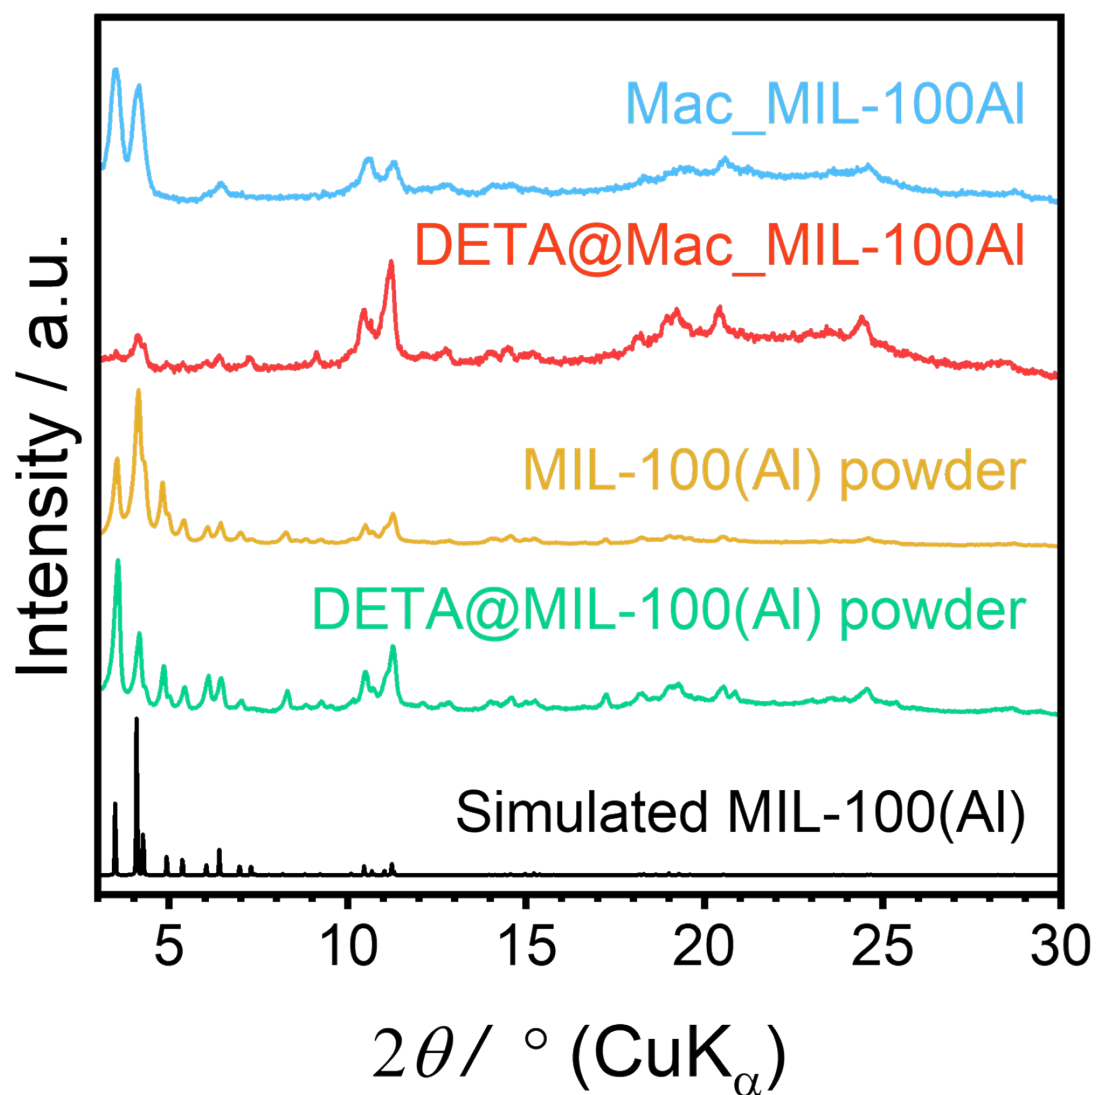

**Figure S5.** PXRD patterns of Mac\_MIL-100Al, DETA@Mac\_MIL-100Al, MIL-100(Al) powder, and DETA@MIL-100(Al) powder compared with the simulated MIL-100(Al) pattern.

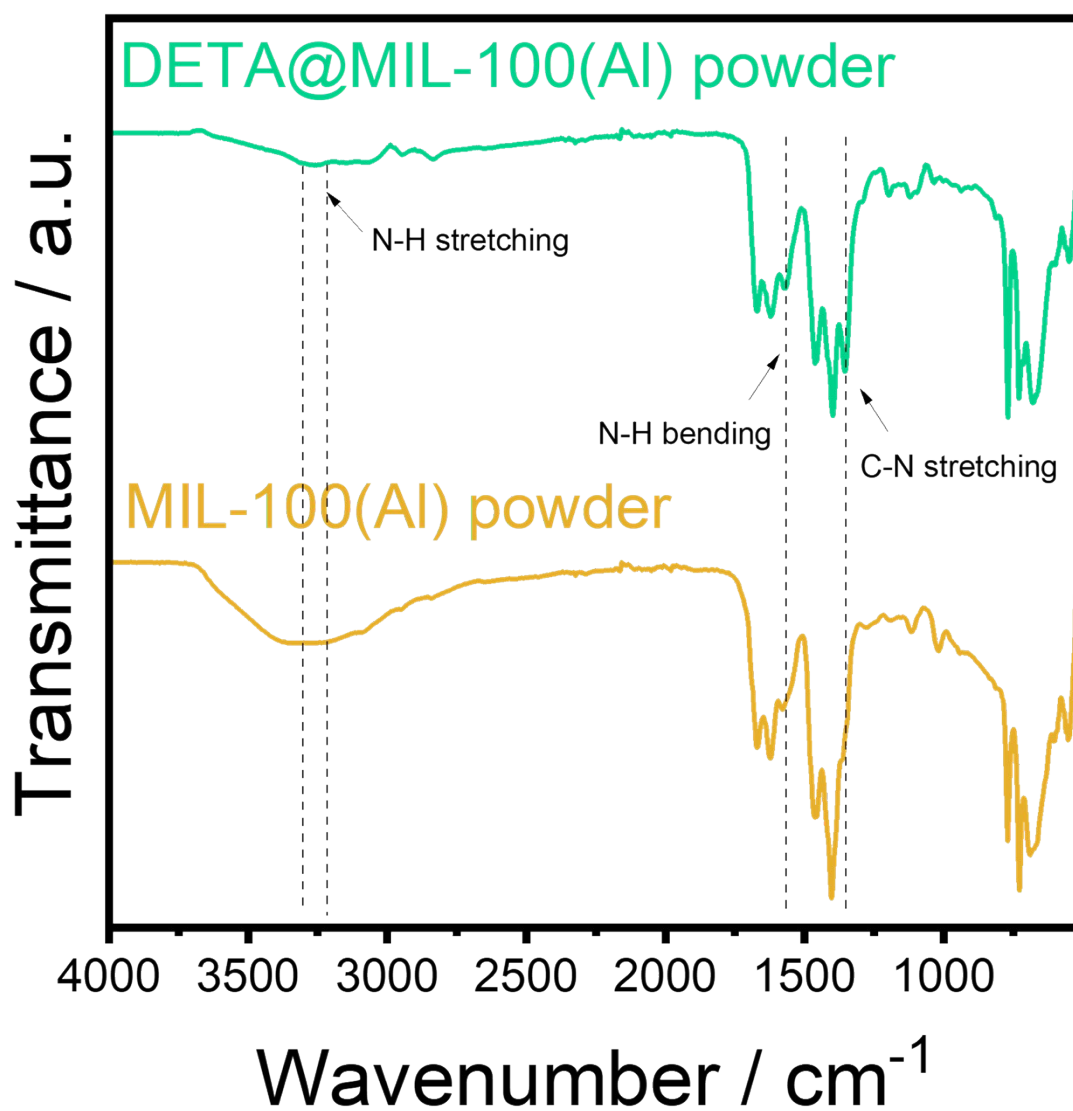

**Figure S6.** FTIR spectra of MIL-100(Al) powder and DETA@MIL-100(Al) powder. The appearance of N–H stretching/bending and C–N stretching bands after DETA treatment confirms amine incorporation, while the retained carboxylate vibrations indicate preservation of the MIL-100(Al) framework environment.

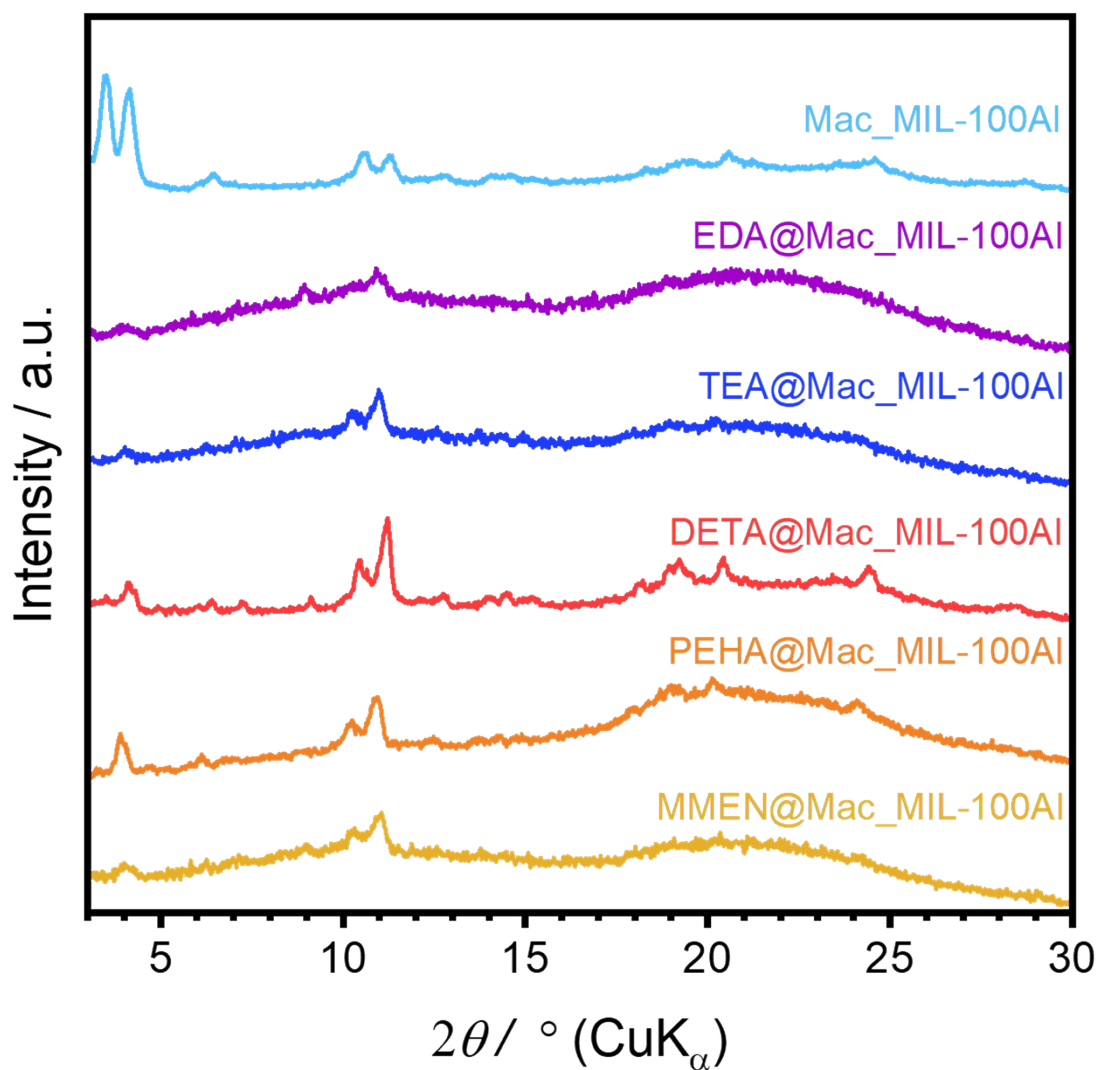

**Figure S7.** PXRD patterns of Mac\_MIL-100Al beads functionalized with different amines: EDA – ethylenediamine, TEA – triethylamine, DETA – diethylenetriamine, PEHA – pentaethylenehexamine, MMEN – N, N'-dimethylethylenediamine.

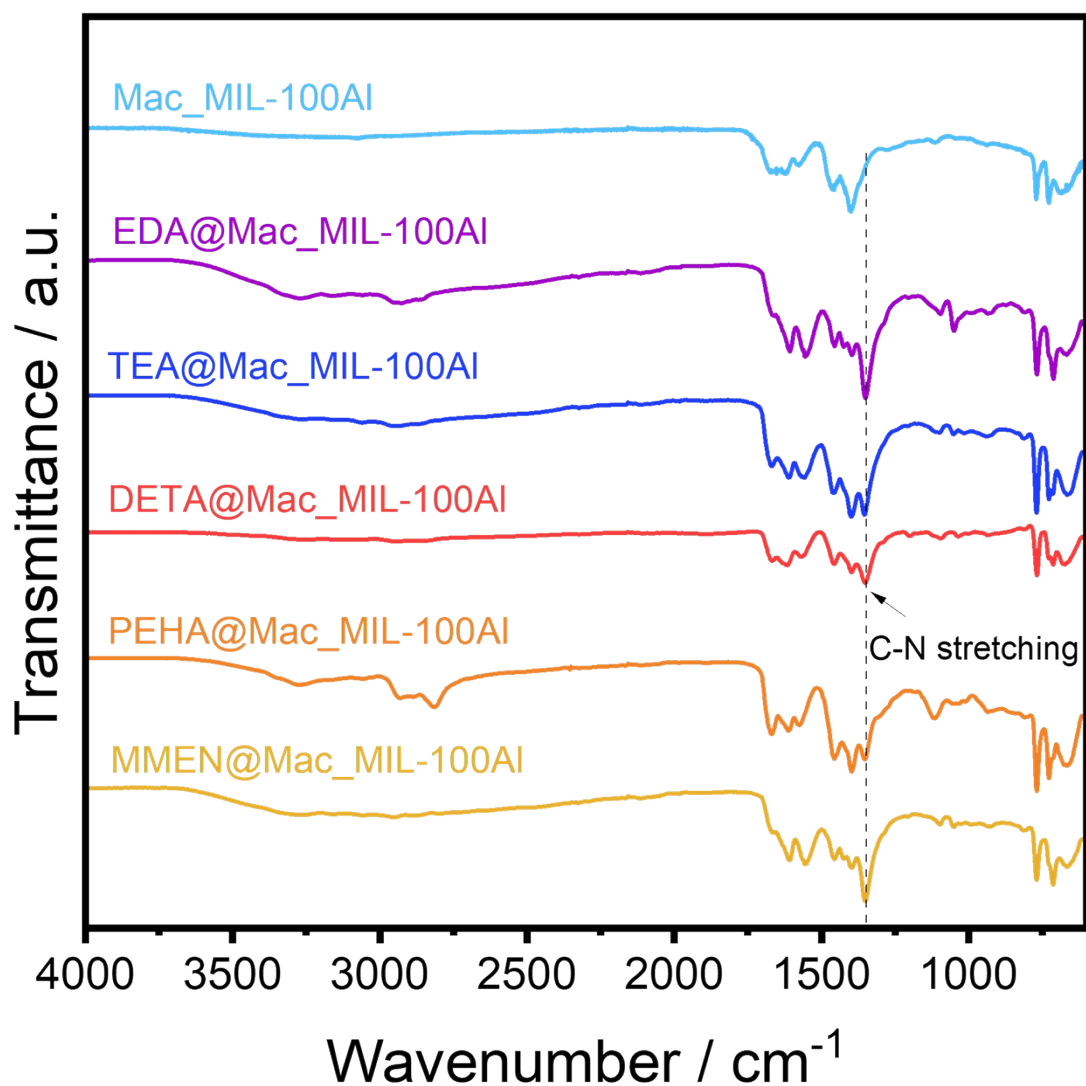

**Figure S8.** FTIR spectra of Mac\_MIL-100Al beads functionalized with different amines: EDA – ethylenediamine, TEA – triethylamine, DETA – diethylenetriamine, PEHA – pentaethylenhexamine, MMEN – N, N'-dimethylethylenediamine.

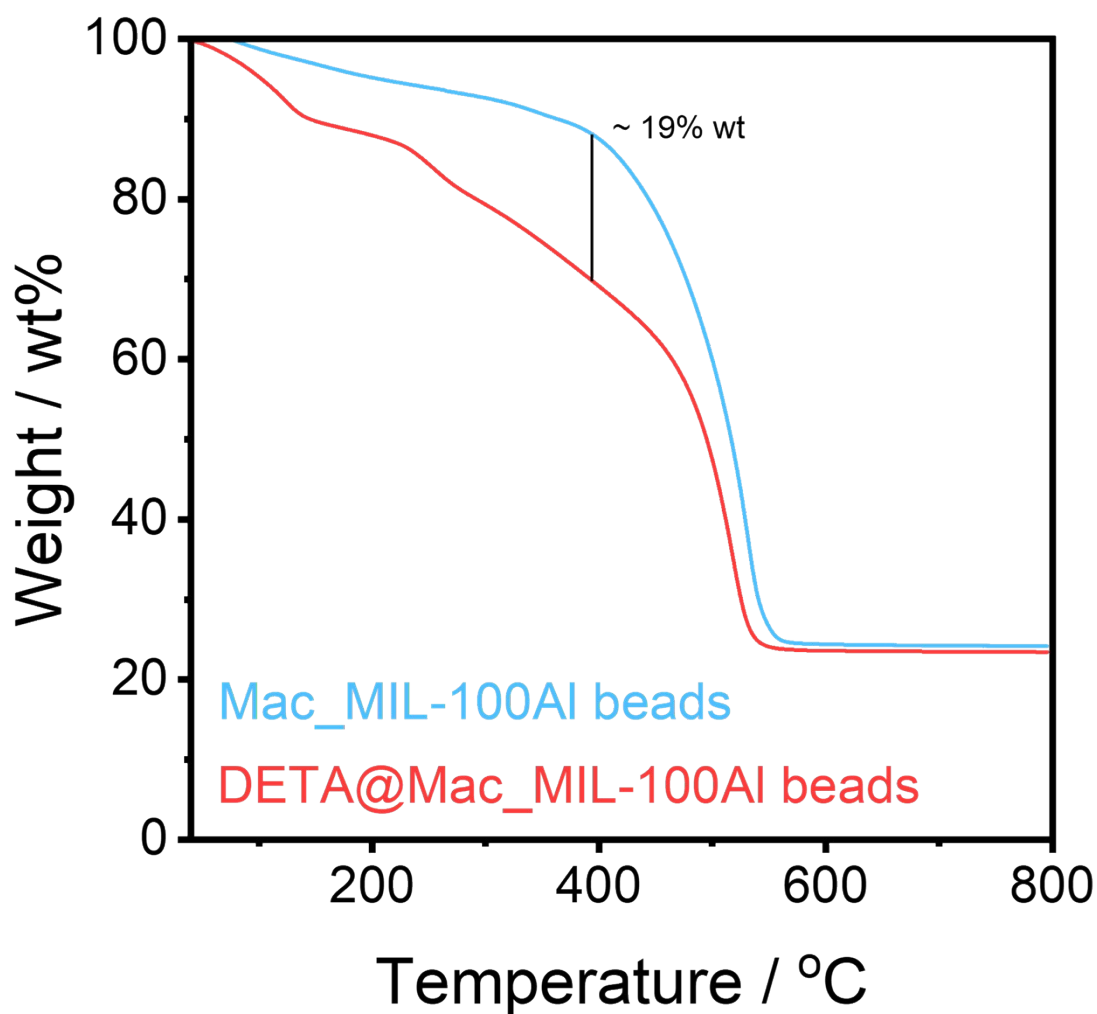

**Figure S9.** TGA curves of pristine Mac\_MIL-100Al beads and DETA@Mac\_MIL-100Al beads measured under air flow at a heating rate of 5 °C min<sup>-1</sup>. The additional low-to-intermediate temperature mass loss observed for DETA@Mac\_MIL-100Al is attributed to residual guest/solvent removal and decomposition/oxidation of incorporated DETA species, supporting successful amine incorporation. The high-temperature mass loss corresponds mainly to decomposition of the MIL-100(Al) framework.

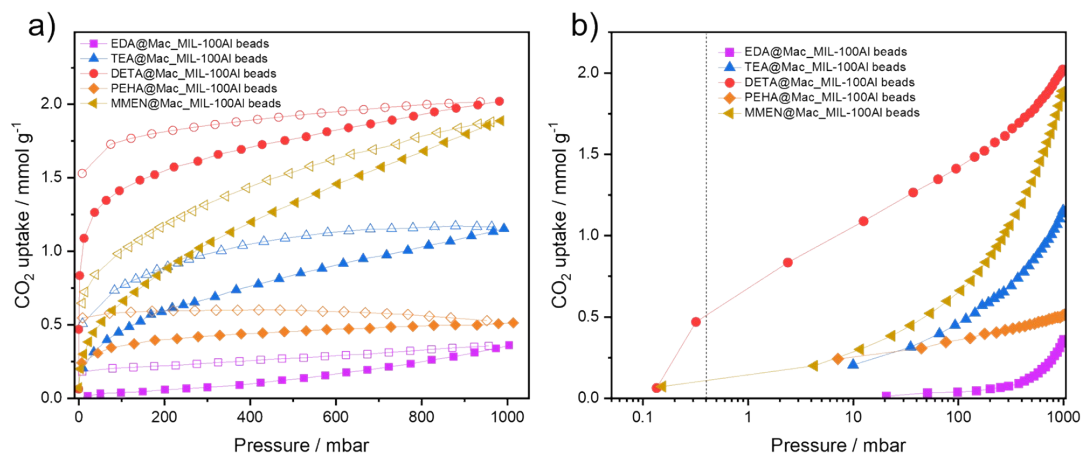

**Figure S10.** CO<sub>2</sub> adsorption isotherms measured at 298 K for DETA@Mac\_MIL-100Al beads (red) (a) in comparison with different amines@Mac\_MIL-100Al beads with pressure plotted on a linear scale; and (b) plotted on logarithmic scale (EDA-purple; TEA-dark blue; DETA-red; PEHA-orange; MMEN-brown).

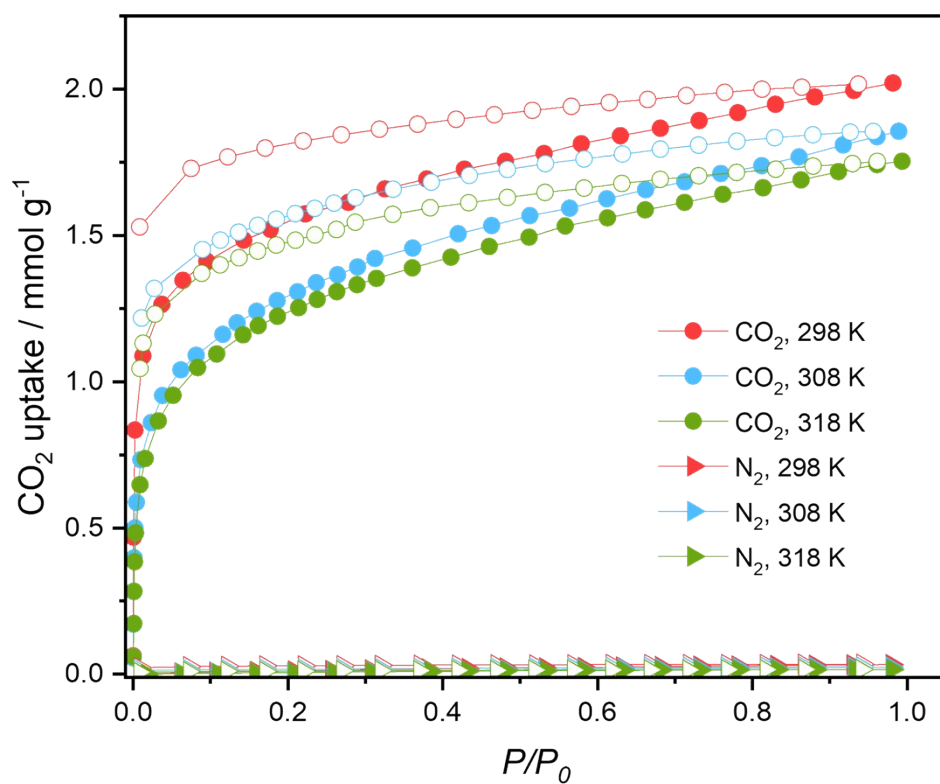

**Figure S11.** CO<sub>2</sub> and N<sub>2</sub> adsorption-desorption isotherms of DETA@Mac\_MIL-100Al beads at 298 K – 308 K – 318 K.

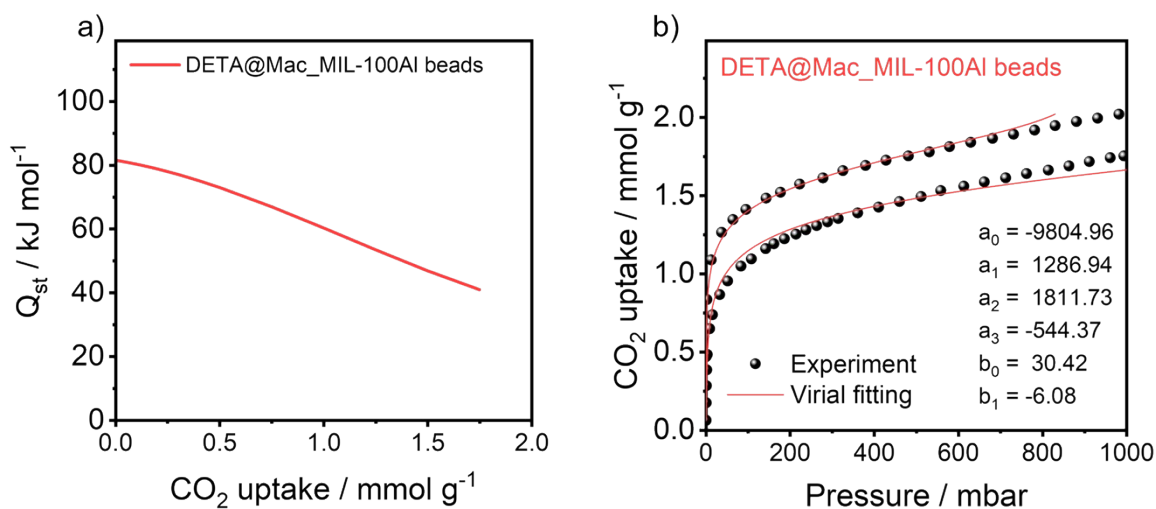

**Figure S12.** Isosteric heat of CO<sub>2</sub> adsorption ( $Q_{st}$ ) (a) for DETA@Mac\_MIL-100Al beads calculated using the virial fitting method (b). The  $Q_{st}$  decreases from approximately 81  $\text{kJ mol}^{-1}$  at near-zero loading to approximately 40  $\text{kJ mol}^{-1}$  at ca. 1.75  $\text{mmol g}^{-1}$ .

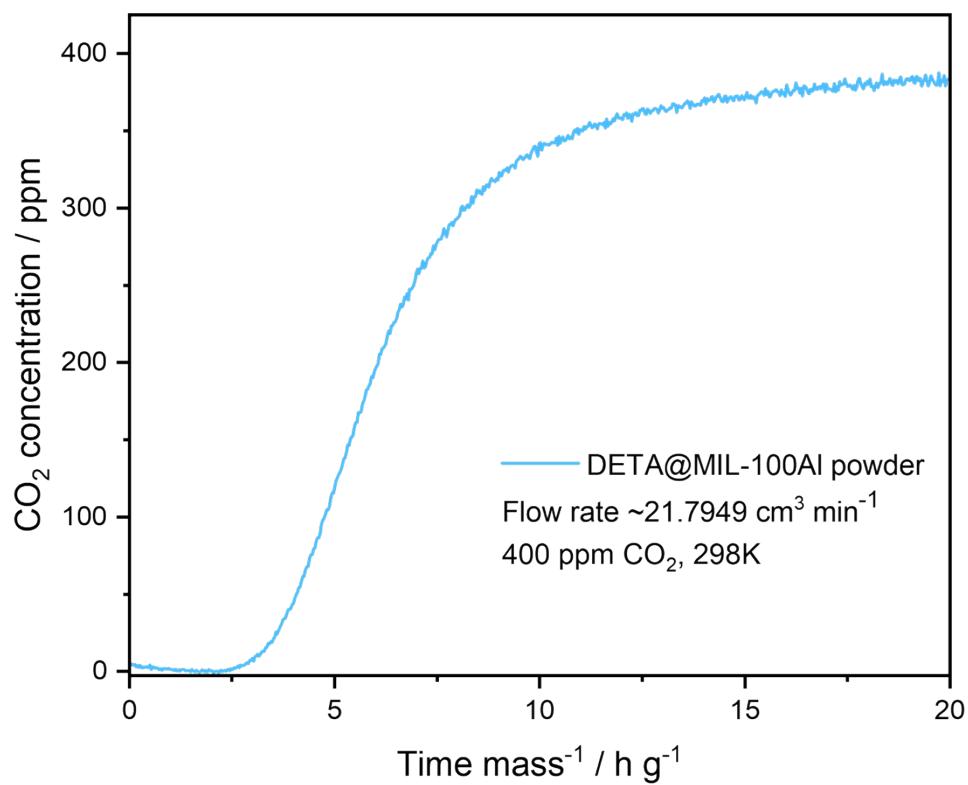

**Figure S13.** CO<sub>2</sub> breakthrough profile of DETA@MIL-100Al powder at the flow rate of 21.7949 ml min<sup>-1</sup> for 400 ppm CO<sub>2</sub>, 298 K.

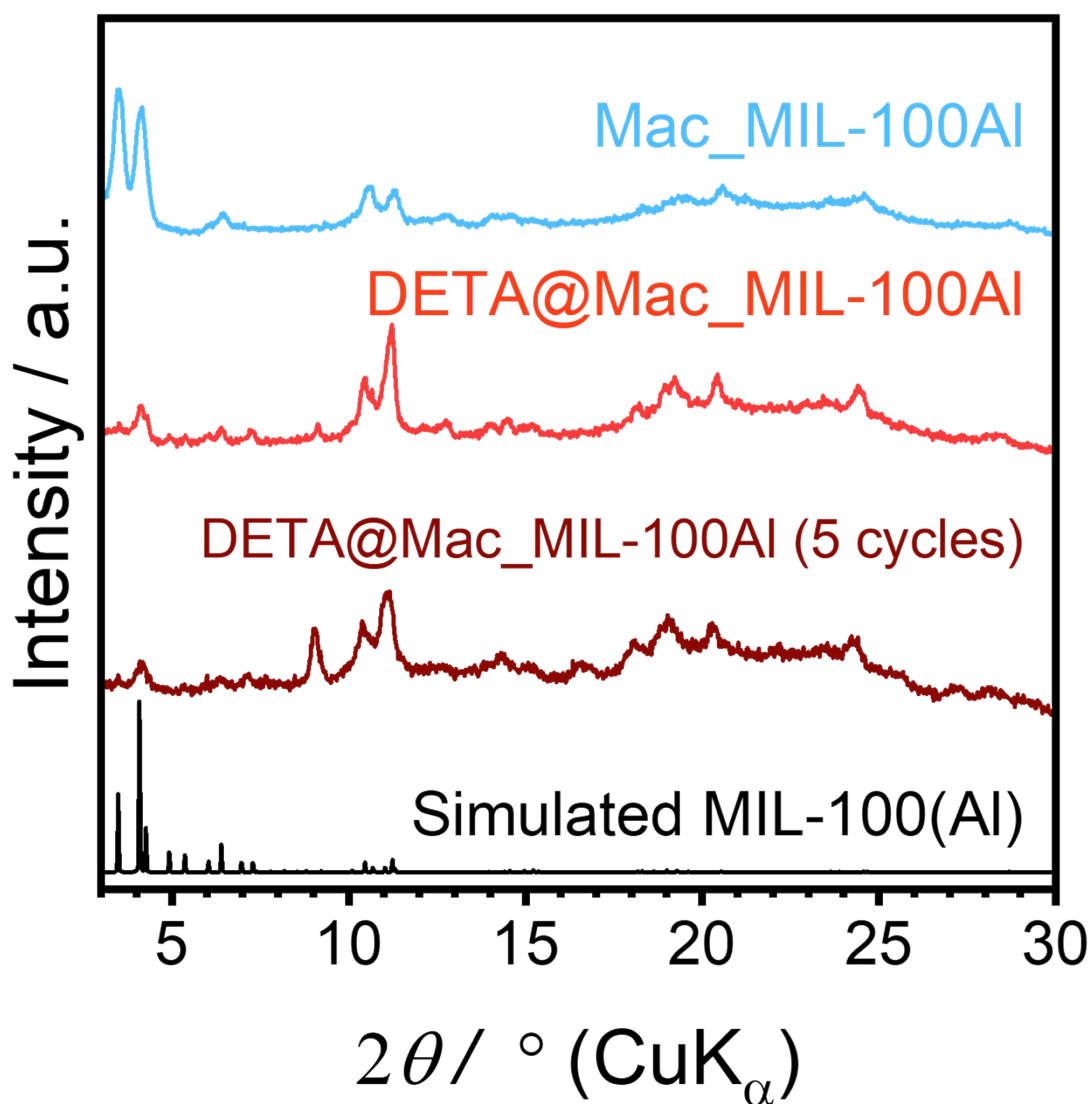

**Figure S14.** PXRD patterns of Mac\_MIL-100Al, DETA@Mac\_MIL-100Al, and DETA@Mac\_MIL-100Al after five CO<sub>2</sub> adsorption–desorption cycles. The weak peak near  $2\theta \approx 9^\circ$  after cycling is tentatively assigned to a MIL-96(Al)-related reflection, indicating minor local rearrangement rather than extensive framework decomposition.

### Section S3. Breakthrough Experiments

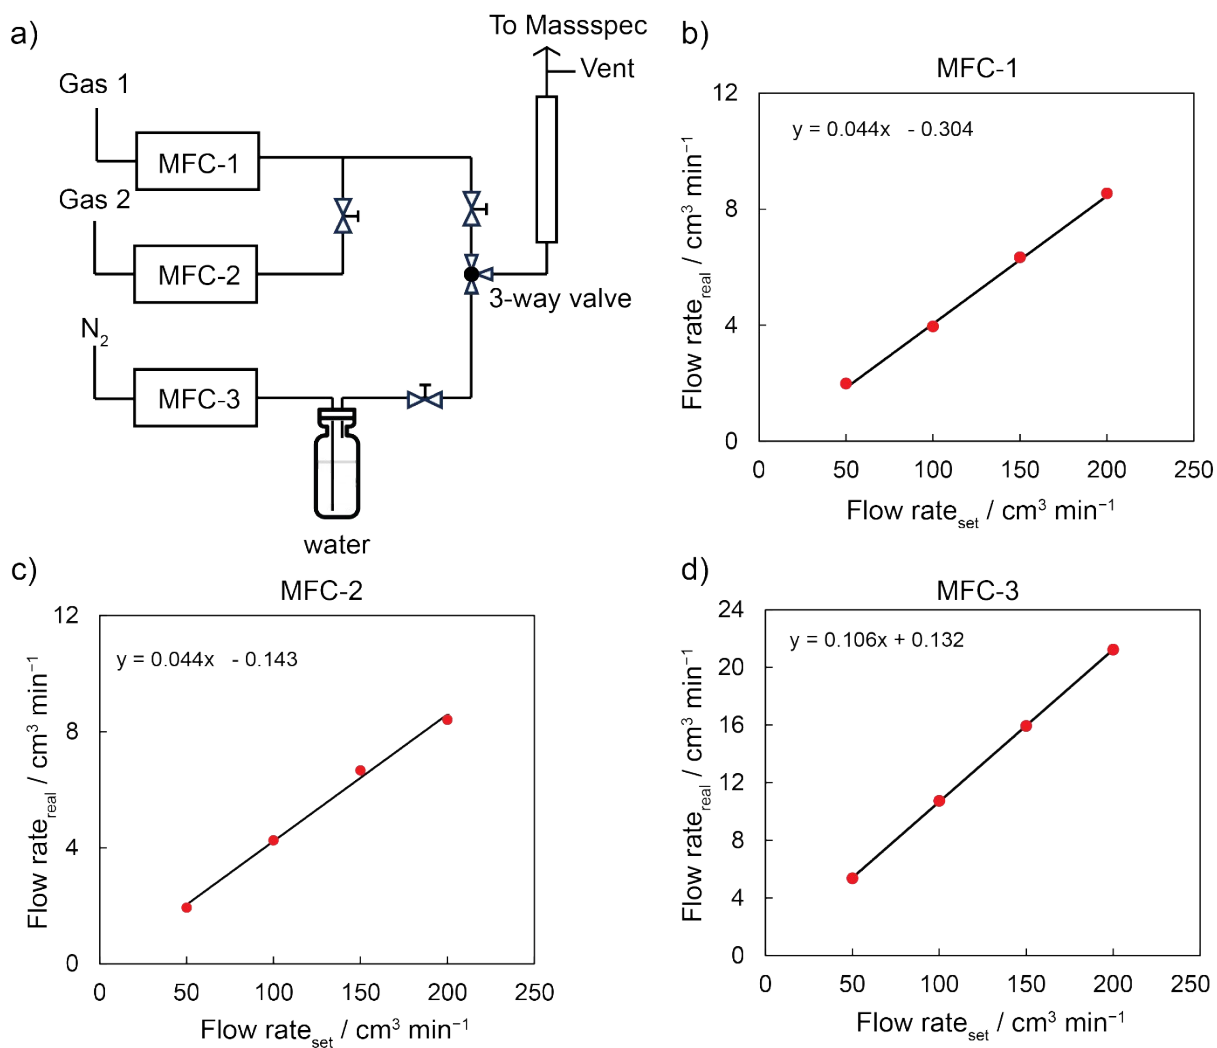

**Figure S15.** Customized system for analysis of the dynamic breakthrough adsorption: (a) the system diagram; and (b, c, d) the flow rate calibrations for MFC-1, 2 and 3.

**Table S3.** Comparison of DETA@Mac\_MIL-100Al beads with representative shaped or structured adsorbents reported for DAC-relevant CO<sub>2</sub> capture. The table summarizes material form, CO<sub>2</sub> concentration, adsorption temperature, measurement method, and reported CO<sub>2</sub> uptake.

| Adsorbents                                                             | Shape                                | CO <sub>2</sub> capture capacity<br>@400ppm / mmol g <sup>-1</sup> | Adsorption method               | Refs      |
|------------------------------------------------------------------------|--------------------------------------|--------------------------------------------------------------------|---------------------------------|-----------|
| DETA@Mac_MIL-100Al beads                                               | Beads<br>~2-3 mm                     | 0.56                                                               | Breakthrough                    | This work |
| DETA@MIL-100Al powder                                                  | Powder                               | 0.08                                                               | Breakthrough                    | This work |
| TRI- $\gamma$ -Al <sub>2</sub> O <sub>3</sub> <sup>(a)</sup>           | Pellet<br>3 mm                       | 0.46                                                               | Breakthrough                    | 2         |
| Wash-coat TRI- $\gamma$ -Al <sub>2</sub> O <sub>3</sub> <sup>(a)</sup> | Honeycomb monolith<br>2 x 2 x 0.4 mm | 0.4                                                                | Breakthrough                    | 2         |
| Diamine-functionalized silica gel                                      | Beads<br>2-5 mm                      | 0.4                                                                | Temperature-concentration swing | 3         |

|                                     |                       |      |                                     |   |
|-------------------------------------|-----------------------|------|-------------------------------------|---|
| Amine-Grafted SBA-15 <sup>(b)</sup> | Pellet                | 0.09 | Breakthrough                        | 4 |
| Li-LSX <sup>(b)</sup>               | Pellet                | 0.82 | Breakthrough                        | 4 |
| K-LSX <sup>(b)</sup>                | Pellet                | 0.25 | Breakthrough                        | 4 |
| NaX <sup>(b)</sup>                  | Pellet                | 0.32 | Breakthrough                        | 4 |
| APS-SBA-15                          | Pellet<br>0.15-0.5 mm | 0.53 | CO <sub>2</sub> adsorption isotherm | 5 |
| A0.2P17                             | Monolith<br>3-4 mm    | 0.56 | Breakthrough                        | 6 |

(a) Measured at 430 ppm CO<sub>2</sub>; (b) Measured at 395 ppm CO<sub>2</sub>.

## REFERENCES

1. T. N. Tu, P. N. Nguyen, H. T. Kwon and J. Kim, *Chem. Eng. J.*, 2025, 519, 164997.
2. Q. Grossmann, V. Stampi-Bombelli, A. Yakimov, S. Docherty, C. Copéret and M. Mazzotti, *Ind. Eng. Chem. Res.*, 2023, 62, 13594-13611.
3. J. A. Wurzbacher, C. Gebald and A. Steinfeld, *Energy Environ. Sci.*, 2011, 4, 3584-3592.
4. A. N. Stuckert and R. T. Yang, *Environ. Sci. Technol.*, 2011, 45, 10257-10264.
5. P. Bollini, N. A. Brunelli, S. A. Didas and C. W. Jones, *Ind. Eng. Chem. Res.*, 2012, 51, 15153-15162.
6. P. Yuan, F. Huang, P. Li, H. Tian, Y. Zhou and T. Li, *J. Environ. Chem. Eng.*, 2026, 14, 121233.
